# Supplementary material for: Supplementation of Medium-Chain Triglycerides Combined with Docosahexaenoic Acid Inhibits Amyloid Beta Protein Deposition by Improving Brain Glucose Metabolism in APP/PS1 Mice
Source: MDPI journal article supplement (doi:10.3390/nu15194244), 2023-10-01
Supplement: s1 [file s1]

Supplementary Materials

Table S1. Macro and micronutrient composition of AIN-93M

| Items               | AIN-93M      |
|---------------------|--------------|
| Energy              | 3601 kcal/kg |
| Water content       | 6.8%         |
| Fat                 | 4%           |
| Carbohydrates       | 72.7%        |
| Protein             | 12.5%        |
| Fatty acids profile |              |
| SFA                 | 16.87%       |
| C14:0               | 0.06%        |
| C16:0               | 10.65%       |
| C17:0               | 0.05%        |
| C18:0               | 4.86%        |
| C20:0               | 0.20%        |
| C21:0               | 0.61%        |
| C22:0               | 0.34%        |
| C24:0               | 0.09%        |
| MUFA                | 23.71%       |
| C16:1               | 0.07%        |
| C17:1               | 0.03%        |

|                  |          |
|------------------|----------|
| C18:1 (n-9)      | 23.44%   |
| C20:1 (n-9)      | 0.17%    |
| N-6 PUFA         | 53.67%   |
| C18:2 (n-6)      | 53.07%   |
| C18:3 (n-6)      | 0.60%    |
| N-3 PUFA         | 5.76%    |
| C18:3 (n-3)      | 5.75%    |
| Mineral content  |          |
| Calcium          | 5000 ppm |
| Phosphorus       | 3000 ppm |
| Potassium        | 3600 ppm |
| Sodium           | 1033 ppm |
| Magnesium        | 511 ppm  |
| Iron             | 45 ppm   |
| Zinc             | 35 ppm   |
| Fierce           | 10 ppm   |
| Copper           | 6 ppm    |
| Iodine           | 0.2 ppm  |
| Chromium         | 1 ppm    |
| Inorganic sulfur | 300 ppm  |
| Chlorine         | 1613 ppm |

#### Vitamin content

|                  |            |
|------------------|------------|
| Vitamin A        | 4 IU/g     |
| Vitamin D        | 1 IU/g     |
| Vitamin E        | 0.075 IU/g |
| Vitamin K        | 0.86 ppm   |
| Thiamine, B1     | 5 ppm      |
| Riboflavin       | 6 ppm      |
| Nicotinic acid   | 30 ppm     |
| Pantothenic acid | 15 ppm     |
| Vitamin B6       | 6 ppm      |
| Choline          | 1000 ppm   |
| Folic acid       | 2 ppm      |
| Biotin           | 0.2 ppm    |
| Vitamin B12      | 25 ppb     |

---

*Note:* Abbreviations: ppm, part per million; IU, International Unit; ppb, part per billion.

**Table S2. The fatty acid profile of corn oil**

| <b>Fatty acid</b> | <b>Corn oil</b> |
|-------------------|-----------------|
| SFA               | 19.48%          |
| C12:0             | 0.26%           |
| C14:0             | 1.22%           |
| C16:0             | 13.42%          |
| C18:0             | 3.34%           |
| C20:0             | 0.43%           |
| MUFA              | 32.26%          |
| C16:1 (n-7)       | 0.26%           |
| C18:1 (n-9)       | 31.00%          |
| C18:1 (n-7)       | 0.65%           |
| C20:1 (n-9)       | 0.26%           |
| N-6 PUFA          | 47.34%          |
| C18:2 (n-6)       | 47.22%          |
| N-3 PUFA          | 1.24%           |
| C18:3 (n-3)       | 1.24%           |
